# Supplementary material for: Use of Lung Cancer Screening With Low-Dose Computed Tomography in the Medicare Population
Source: PubMed Central journal article supplement — Mayo Clin Proc Innov Qual Outcomes. 2019 Feb 26;3(1):70–7. doi: 10.1016/j.mayocpiqo.2018.12.003 (PMC6410337; doi:10.1016/j.mayocpiqo.2018.12.003), 2019-02-26
Supplement: mmc1.pdf [file mmc1.pdf]

eFigure 1

Appendix Figure. Cohort selection using the 20% sample of Medicare data in  
2010, 2015 and 2016

Step 1. All enrollees

2010: n = 10,792,566

2015: n = 12,360,001

2016: n = 12,118,876

Step 2. All enrollees aged 55-77

2010: n = 6,620,044 (61.34%)

2015: n = 8,086,994 (65.43%)

2016: n = 8,243,250 (68.02%)

Step 3: All enrollees with complete Part A&B in 2010, or 2015, or 2016

2010: n = 5,550,007 (83.84%)

2015: n = 6,734,354 (83.27%)

2016: n = 6,726,043 (81.59%)

Step 4: All enrollees with no HMO in 2010, or 2015, or 2016

2010: n = 3,887,430 (70.04%)

2015: n = 4,200,875 (62.68%)

2016: n = 4,145,542 (61.63%)

Note: For Analyses involving comorbidity measurement, we further restricted the cohort to require

(1) Also have complete Part A&B with no HMO coverage in previous year

2015: n = 3,673,046 (87.44%)

2016: n = 3,586,760 (86.52%)

(2) For the analyses involving estimated life expectancy, we further restricted the cohort to those aged

66+ among the 2016 cohort in (1): 2016: n = 3,071,441 (85.63%)

---
